# Supplementary material
Source: PubMed Central journal article supplement (PMC3129223)

A

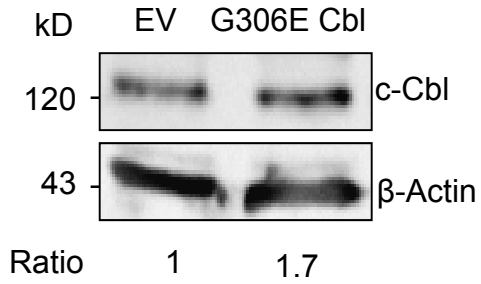

B

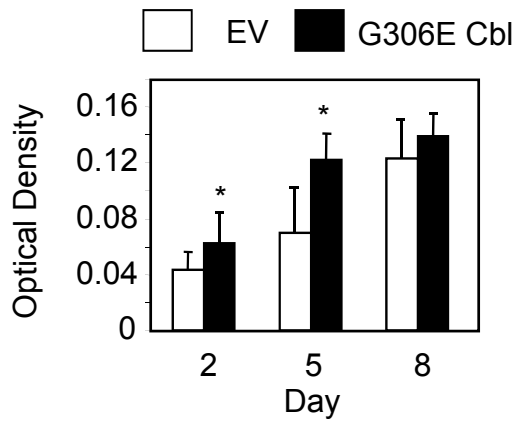

C

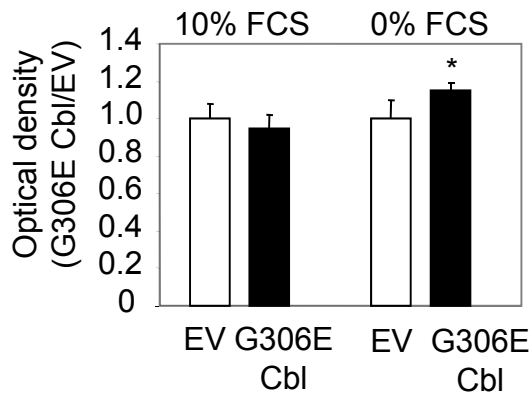

Supplement: supp_M110.197525_jbc.M110.197525-1.pdf [file supp_M110.197525_jbc.M110.197525-1.pdf]

**A**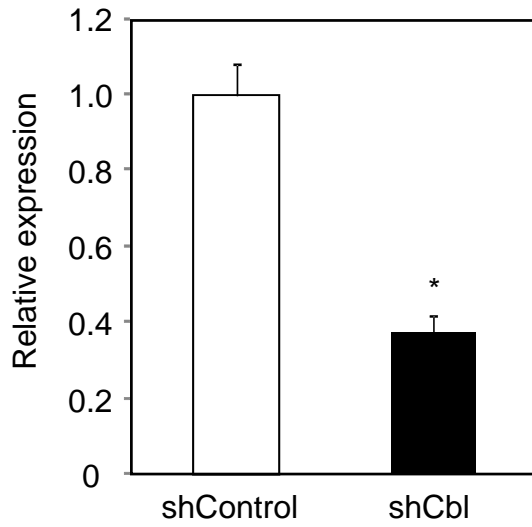**B**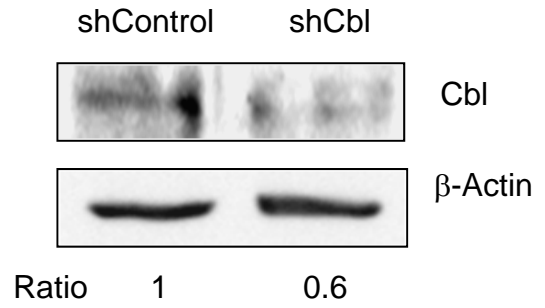**C**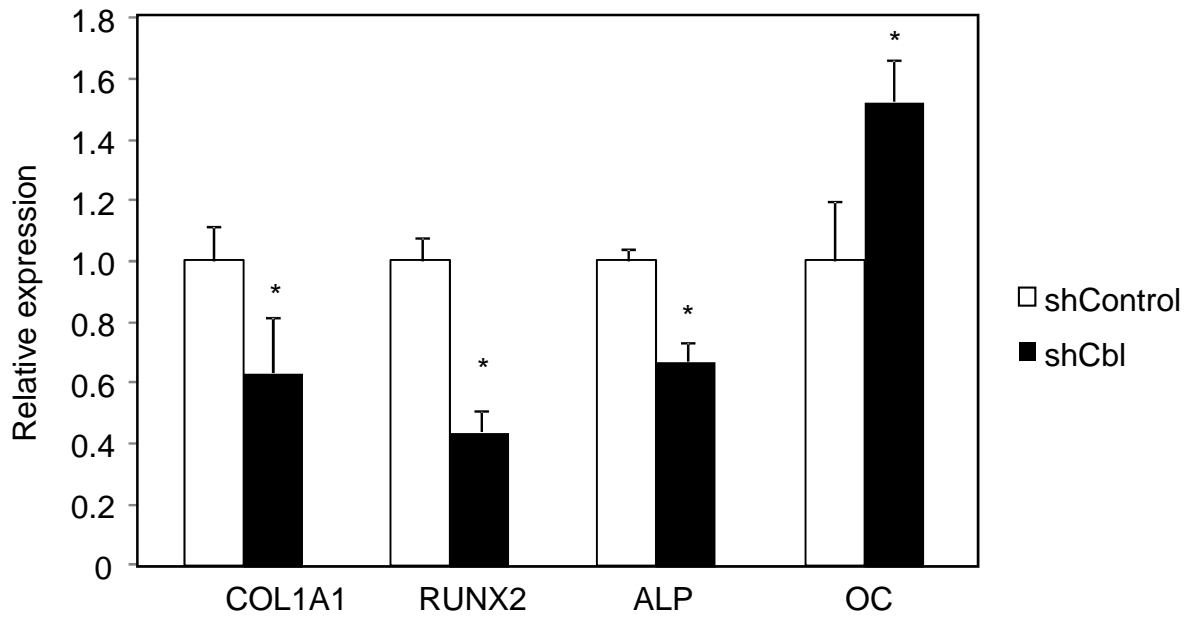

Supplement: supp_M110.197525_jbc.M110.197525-2.pdf [file supp_M110.197525_jbc.M110.197525-2.pdf]

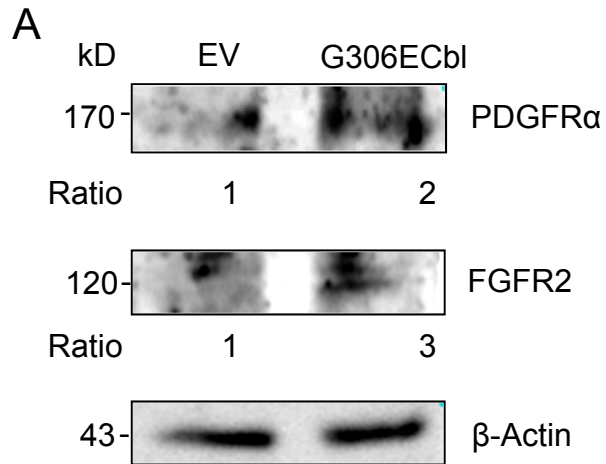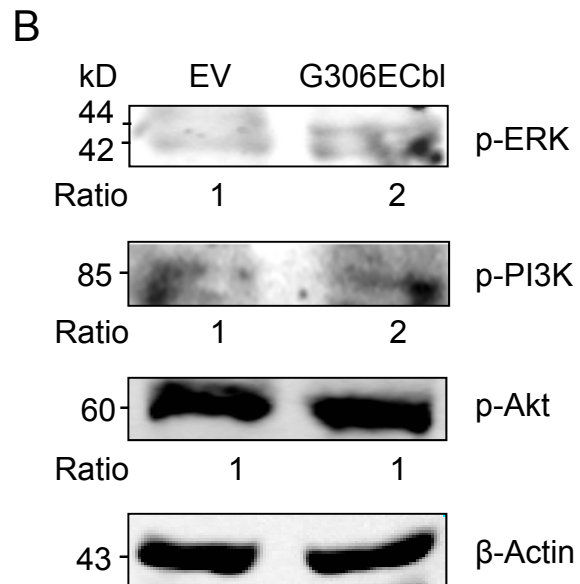

Supplement: supp_M110.197525_jbc.M110.197525-3.pdf [file supp_M110.197525_jbc.M110.197525-3.pdf]
